# Supplementary material
Source: ML conference proceedings conference paper supplement (https://openreview.net/forum?id=c5dRV9tA3K)
Supplement: supplementary_material [file attachment]

---

# Appendix

---

Anonymous Author(s)

Affiliation

Address

email

## A Training Corpora and Hyper-parameters

### A.1 Training Corpora

As for monolingual data, we follow Conneau et al. [2020] to build a Common-Crawl Corpus using the CCNet [Wenzek et al., 2020] tool<sup>1</sup>, which is widely used in the literature Huang et al. [2019], Luo et al. [2021], Chi et al. [2021], Wei et al. [2021]. Further, we collect parallel corpora from CCAligned El-Kishky et al. [2020], CCMatrix Schwenk et al. [2021], WMT Akhbardeh et al. [2021], and MultiUN Ziemski et al. [2016], involving 94 languages with more than 4.8 billion sentence pairs. We use the OpusFilter<sup>2</sup> tool to remove noisy bitexts, which results in 3.2 billion sentence pairs. Table 1 shows the statistics for both monolingual and parallel data. We apply subword tokenization directly on raw text data using Sentence Piece Model Kudo and Richardson [2018] without any additional preprocessing. To better support our motivation that EMMA-X can cover more languages than previous cross-lingual sentence representations, we divide Tatoeba Artetxe and Schwenk [2019] into two subsets: “Head”, containing languages usually covered in previous methods, and “Long-tail”, with other languages. We treat the 36 languages containing in XTREME Ruder et al. [2021] as head languages, which are: “ar, he, vi, id, jv, tl, eu, ml, ta, te, af, nl, en, de, el, bn, hi, mr, ur, fa, fr, it, pt, es, bg, ru, ja, ka, ko, th, sw, zh, kk, tr, et, fi, hu, az, lt, pl, uk, ro”. The remaining 76 languages in Tatoeba are treated as long-tail ones.

### A.2 Hyper-parameters

The parameters of EMMA-X are first initialized with XLM-R, with 24 layers of Transformer [Vaswani et al., 2017] encoder, 1024 hidden states, and 16 attention heads. We set the total semantic ranks as 4. The GMM classifier is implemented as a mixture of Gaussian forms, each of which consists of a prior  $\pi \in \mathbb{R}^1$ , a mean  $\mu \in \mathbb{R}^{1024}$ , and a variance  $\sigma \in \mathbb{R}^{1024}$ , all are trainable variables. We optimize the GMM classifier with Adam ( $\beta_1=0.9$ ,  $\beta_2=0.999$ ) Kingma and Ba [2015] using a batch size of 1024 and a learning rate of 3e-5. For cross-lingual encoder, we apply the same training setting as MoCo He et al. [2020], with the momentum queue  $K$  to be 256 and temperature as 0.04. We set the momentum coefficient to 0.999 and use the Adam optimizer with a cosine decay learning rate whose peak is 5e-4.

## B FLORES-200 Dataset and Geometric Analysis

### B.1 FLORES-200 dataset

FLORES-200 Goyal et al. [2022], Costa-jussà et al. [2022] is a many-to-many multilingual benchmark, which consists of 3001 sentences in 204 total languages. FLORES-200 sourced all sentences from English WikiMedia and translated these English sentences to 204 languages by human translators. In particular, sentences in FLORES-200 have a much larger breadth of topics, for they are

---

<sup>1</sup>[https://github.com/facebookresearch/cc\\_net](https://github.com/facebookresearch/cc_net)

<sup>2</sup><https://github.com/Helsinki-NLP/OpusFilter>

| Code | Size (GB) | Sent. (M) |
|------|-----------|-----------|------|-----------|-----------|------|-----------|-----------|------|-----------|-----------|------|-----------|-----------|
| af   | 1.3       | -         | et   | 6.1       | 22.3      | ja   | 24.2      | 89.2      | mt   | 0.2       | -         | sq   | 3.0       | -         |
| am   | 0.7       | -         | eu   | 2.0       | 0.81      | jv   | 0.2       | -         | my   | 0.9       | -         | sr   | 5.1       | -         |
| ar   | 20.4      | 72.3      | fa   | 21.6      | 7.5       | ka   | 3.4       | 2.0       | ne   | 2.6       | -         | su   | 0.1       | -         |
| as   | 0.1       | -         | fi   | 19.2      | 92.8      | kk   | 2.6       | 2.8       | nl   | 15.8      | 66.0      | sv   | 10.8      | 74.2      |
| az   | 3.6       | 0.82      | fr   | 46.5      | 331.5     | km   | 1.0       | 0.84      | no   | 3.7       | -         | sw   | 1.6       | 1.7       |
| be   | 3.5       | 0.51      | fy   | 0.2       | 0.13      | kn   | 1.2       | -         | om   | 0.1       | -         | ta   | 8.2       | 2.79      |
| bg   | 22.6      | 47.2      | ga   | 0.5       | -         | ko   | 17.2      | 79.3      | or   | 0.6       | -         | te   | 2.6       | -         |
| bn   | 7.9       | 7.52      | gd   | 0.1       | 0.05      | ku   | 0.4       | -         | pa   | 0.8       | -         | th   | 14.7      | 13.1      |
| br   | 0.1       | -         | gl   | 2.9       | 0.77      | ky   | 1.2       | -         | pl   | 16.8      | 79.7      | tl   | 0.8       | -         |
| bs   | 0.1       | -         | gu   | 0.3       | -         | la   | 2.5       | -         | ps   | 0.7       | -         | tr   | 17.3      | 93.8      |
| ca   | 10.1      | 14.9      | ha   | 0.3       | -         | lo   | 0.6       | -         | pt   | 15.9      | 247.6     | ug   | 0.4       | -         |
| cs   | 16.3      | 108.4     | he   | 6.7       | 47.1      | lt   | 7.2       | 11.0      | ro   | 8.6       | 60.4      | uk   | 9.1       | 0.78      |
| cy   | 0.8       | -         | hi   | 20.2      | 3.2       | lv   | 6.4       | 0.37      | ru   | 48.1      | 134.9     | ur   | 5.0       | 1.15      |
| da   | 15.2      | 8.0       | hr   | 5.4       | -         | mg   | 0.2       | -         | sa   | 0.3       | -         | uz   | 0.7       | -         |
| de   | 46.3      | 283.4     | hu   | 9.5       | 55.2      | mk   | 1.9       | -         | sd   | 0.4       | -         | vi   | 44.6      | 15.3      |
| el   | 29.3      | 95.1      | hy   | 5.5       | 1.7       | ml   | 4.3       | 1.07      | si   | 2.1       | 0.60      | xh   | 0.1       | -         |
| en   | 49.7      | -         | id   | 10.6      | 184.6     | mn   | 1.7       | 0.19      | sk   | 4.9       | -         | yi   | 0.3       | -         |
| eo   | 0.9       | 0.18      | is   | 1.3       | -         | mr   | 1.3       | -         | sl   | 2.8       | 9.8       | zh   | 36.8      | 379.4     |
| es   | 44.6      | 279.6     | it   | 19.8      | 179.3     | ms   | 3.2       | 2.1       | so   | 0.4       | -         | -    | -         | -         |

Table 1: The statistics of CC-100 and the collected parallel corpora used for training. We report the list of 94 languages and include the size of the monolingual data (in GiB) and the number of sentence pairs (in Millions, which denotes the number of sentence pairs between the specific language and English) in parallel corpora for each language. “-” means the number of sentence pairs is less than 0.1 million.

|                                         |                 |                  |
|-----------------------------------------|-----------------|------------------|
| Number of Sentences                     | 3001            |                  |
| Average Words per Sentence              | 21              |                  |
| Number of Articles                      | 842             |                  |
| Average Number of Sentences per Article | 3.5             |                  |
| <b>Domain</b>                           | <b>Articles</b> | <b>Sentences</b> |
| WikiNews                                | 309             | 993              |
| WikiJunior                              | 284             | 1006             |
| WikiVoyage                              | 249             | 1002             |
| <b>Sub-Topic</b>                        | <b>Articles</b> | <b>Sentences</b> |
| Crime                                   | 155             | 313              |
| Disasters                               | 27              | 65               |
| Entertainment                           | 28              | 68               |
| Geography                               | 36              | 86               |
| Health                                  | 27              | 67               |
| Nature                                  | 17              | 45               |
| Politics                                | 171             | 341              |
| Science                                 | 154             | 325              |
| Sports                                  | 154             | 162              |
| Travel                                  | 505             | 1529             |

Table 2: Basic Statistics of FLORES-200.

collected from three different sources: WikiNews<sup>3</sup>, WikiJunior<sup>4</sup> and WikiVoyage<sup>5</sup>. We summarize the basic statistics of all languages in FLORES-200 in Table 2. Similar to Tatoeba [Artetxe and Schwenk, 2019], we treat English data “eng\_Latn” as retrieval labels and report the retrieval accuracy using the same scripts as Tatoeba in XTREME [Ruder et al., 2021]. We set the 68 languages: “bel\_Cyrl, bos\_Latn, hun\_Latn, epo\_Latn, khm\_Khmr, urd\_Arab, srp\_Cyrl, jav\_Latn, hye\_Armn, gla\_Latn, por\_Latn, lit\_Latn, bul\_Cyrl, slk\_Latn, mal\_Mlym, ita\_Latn, nno\_Latn, mar\_Deva, hrv\_Latn, hin\_Deva, kat\_Geor, ben\_Beng, fin\_Latn, cym\_Latn, oci\_Latn, cat\_Latn, fao\_Latn, xho\_Latn, spa\_Latn, ron\_Latn, amh\_Ethi, ces\_Latn, swe\_Latn, nld\_Latn, tat\_Cyrl, kor\_Hang, glg\_Latn, fra\_Latn, eus\_Latn, ind\_Latn, dan\_Latn, tha\_Thai, deu\_Latn, tel\_Telu, afr\_Latn, pol\_Latn, est\_Latn, uig\_Arab, ukr\_Cyrl, uzb\_Latn, heb\_Hebr, kaz\_Cyrl, nob\_Latn, rus\_Cyrl, vie\_Latn, arb\_Arab, zho\_Hans, tuk\_Latn, khk\_Cyrl, jpn\_Jpan, ell\_Grek, isl\_Latn, tam\_Taml, slv\_Latn, tur\_Latn, mkd\_Cyrl, tgl\_Latn, gle\_Latn” as “Head” languages, and the remaining 135 languages (excluded English data) as “Long-tail” ones.

<sup>3</sup><https://en.wikinews.org/wiki/MainPage>

<sup>4</sup><https://en.wikibooks.org/wiki/Wikijunior>

<sup>5</sup>[https://en.wikivoyage.org/wiki/Main\\_Page](https://en.wikivoyage.org/wiki/Main_Page)

| Task category       | Task         | Train         | Dev          | Test         | Lang.    | Metric   | Domain     |
|---------------------|--------------|---------------|--------------|--------------|----------|----------|------------|
| Inference           | AmericasNLI  | 392,702       | 222-743      | 738-750      | 10       | Accuracy | Misc.      |
|                     | XNLI         | 392,702       | 2,490        | 5,010        | 15       | Accuracy | Misc.      |
| Semantic Similarity | Multi-STS    | 550,152+5,749 | 10,000+1,500 | 250          | 7        | Spearman | Misc.      |
|                     | WMT21QETask1 | 7,000         | 1,000        | 1,000        | 7 (11)   | Pearson  | News       |
| Sentence Retrieval  | LARQA        | 87,599        | 10,579       | 1,190        | 11       | mAP@20   | Wikipedia  |
|                     | Mewsli-X     | 116,093       | 10,252       | 428-1,482    | 11 (50)  | mAP@20   | News       |
|                     | BUCC         | -             | -            | 1,896-14,330 | 5        | F1       | Wiki/News  |
|                     | Tatoeba      | -             | -            | 1,000        | 36 (122) | Accuracy | Misc.      |
| Classification      | XCOPA        | 33,410+400    | 100          | 500          | 11       | Accuracy | Misc.      |
|                     | MultiEURLEX  | 55,000        | 5,000        | 5,000        | 23       | Accuracy | Legal      |
|                     | MultiARC     | 200,000       | 5,000        | 5,000        | 6        | MAE      | Reviews    |
|                     | PAWS-X       | 49,401        | 2,000        | 2,000        | 7        | Accuracy | Wiki/Quora |

Table 3: Overview of XRETE tasks. For tasks that have training and dev sets in other language, we only report the number of sentences in English sets. We report the number of test examples per languages.

## 46 B.2 Three measurements in Geometric Analysis

**Invariance Measurement** implies whether the semantic distributions of all languages are similar [Abend and Rappoport, 2017]. We adopt a Gaussian form  $\mathcal{N}_l(\mu_l, \sigma_l^2)$  where  $\mu_l = \frac{\sum_{\mathbf{x} \in \mathcal{L}} \gamma(\mathbf{x})}{3001}$  and  $\sigma_l^2 = \sum_{\mathbf{x} \in \mathcal{L}} (\gamma(\mathbf{x}) - \mu_l)(\gamma(\mathbf{x}) - \mu_l)^T$ , to approximate the semantic distribution of each language  $l$ . Further, we compute the mean averaged KL-divergence (KL-D for short) [Kullback and Leibler, 1951] among all language pairs as the overall Invariance score  $\mathcal{I}_v$  with  $L$  as the total number of languages:

$$\mathcal{I}_v = \frac{1}{L \times (L - 1)} \sum_{l_1 \neq l_2} \frac{\mathbf{KL}(\mathcal{N}_{l_1} || \mathcal{N}_{l_2}) + \mathbf{KL}(\mathcal{N}_{l_2} || \mathcal{N}_{l_1})}{2}. \quad (1)$$

**Canonical Form Measurement** Previous works [Teller, 2000, Irwin et al., 2009] have demonstrated that a good multilingual space should distribute sentence representations based on their semantic similarities rather than language families. To measure this in quantity, we focus on Calinski-Harabasz Index (CH-I) [Caliński and Harabasz, 1974], which measures how similar an object is to its own cluster compared to other clusters. We group all semantically equivalent sentences in a cluster, which leads to 3001 clusters and each observes 204 sentences in 204 different languages. Assuming  $c_k$  and  $c$  are the centroid of cluster  $k$  and the whole dataset  $\mathcal{S}$ , respectively. The CH-I  $\mathcal{C}_h$  is defined as:

$$\mathcal{C}_h = \left[ 204 \times \sum_{k=1}^K \|c_k - c\|^2 \right] / \left[ \sum_{k=1}^K \sum_{s \in \mathcal{S}} \|s - c_k\|^2 \right]. \quad (2)$$

47 The higher the CH-I is, the better the semantically equivalent sentences are clustered.

**Isotropy Measurement** A high-dimensional embedding space often demonstrates poor isotropy, and deteriorates into a low-dimensional manifold that greatly limits the expressive ability of the embedding space. We adopt principal ratio (PR) [Mu and Viswanath, 2018] to measure isotropy. Let  $\mathcal{E}$  be the sentence representation matrix,  $\mathbf{v}$  be the set of the eigenvectors of  $\mathcal{E}$ , the Isotropy  $\mathcal{I}_{so}$  is

$$\mathcal{I}_{so} = \min_{v \in \mathbf{V}} \sum_{e \in \mathcal{E}} \exp(v^\top e) / \max_{v \in \mathbf{V}} \sum_{e \in \mathcal{E}} \exp(v^\top e). \quad (3)$$

48 The closer  $\mathcal{I}_{so}$  is to 1, the more isotropic the representation space is.

## 49 C XRETE: Cross-lingual Representation Transfer Evaluation

50 XRETE consists of 12 tasks that fall into four different categories. In our “translate-train-all” setting,  
51 we individually fine-tune models with English training set and its translated training sets on each  
52 task. Then we report the performance of our fine-tuned model. We give an overview in Table 3 and  
53 describe the task details as follows.

54 **XNLI** The Cross-lingual Natural Language Inference corpus Conneau et al. [2018] tasks the  
55 systems with reading two sentences and determining whether one entails the other, contradicts it,

or neither (neutral). A crowdsourcing-based procedure is used for collecting English examples, which are later translated into ten target languages for evaluation. Training data stays consistent with the English training data of MultiNLI Williams et al. [2018]. For evaluation, we concatenate two sentences as input and apply a new classification head to distinguish sentence relationships. We perform “translate-train-all” evaluation, where model is first fine-tuned on English training data and its translated data in other languages, then evaluated on test sets.

**AmericasNLI (ANLI)** The AmericasNLI Ebrahimi et al. [2022] is an extension of XNLI task to 10 Indigenous languages of the Americas. All of these languages are truly low-resource languages and serve as a good testbed for zero-shot cross-lingual transferability. As Spanish is more relative to the target languages, the Spanish version of XNLI subset is translated for evaluation. For training, both English and Spanish versions of MultiNLI training data are provided. We evaluate on ANLI following the same settings as in XNLI.

**MultiSTS** The Multilingual Semantic Textual Similarity dataset Cer et al. [2017], Reimers and Gurevych [2020] aims to assign a semantic similarity score for a pair of sentences. The MultiSTS dataset contains 7 cross-lingual sentence pairs and 3 monolingual pairs. Stanford NLI Bowman et al. [2015] and English STS Cer et al. [2017] are provided as training sets. We report the results after first fine-tuning on English training set using a Siamese network structure [Reimers and Gurevych, 2020]. Then we compute the cosine similarity between the sentence pairs and compute Spearman’s rank correlation between the predicted score and gold score following Reimers and Gurevych [2020].

**WMT21QETask1 (QE)** The WMT21 Quality Estimation Task 1 Sentence-level Direct Assessment Specia et al. [2021] aims at testing the translation quality and this task has been applied to test the sensitivity of language models to semantic similarity Tiyaamorn et al. [2021]. The training and evaluation sets are collected from Wikipedia by translating sentences using state-of-the-art translation models to 6 languages and annotated by professional translators. In WMT21, 4 new language pairs with no training data are given to test zero-shot cross-lingual transferability. Our evaluation setting on QE is similar to that on MultiSTS, but we report Pearson’s rank correlation [Kepler et al., 2019].

**LAReQA** The Language-Agnostic Retrieval Question Answering Roy et al. [2020] is a QA retrieval task where models are required to retrieve all relevant answers in different languages over a large multilingual pool. The dataset is constructed on XQuAD Artetxe et al. [2020] and a question is linked with answer sentences in different languages. The training set of SQuAD v1.1 Rajpurkar et al. [2016] is used to fine-tune the model to adapt to QA retrieval task. During evaluation, sentence embeddings are also obtained by a siamese network, and we retrieve the sentences with the highest cosine similarity as predictions.

**Mewsli-X** Mewsli (Multilingual Entities in News, linked) requires linking an entity mention to its entry in a language-agnostic knowledge base Botha et al. [2020]. Mewsli-X Ruder et al. [2021] features 15k mentions in 11 languages. For each mention, Mewsli-X offer entity description candidate pool containing 1M candidates across 50 languages. Fine-tuning is done on a predefined set of English-only mention-entity pairs from English Wikipedia hyperlinks. Our evaluation setting is identical to LAReQA.

**BUCC** The second and third shared task of the workshop on Building and Using Parallel Corpora Zweigenbaum et al. [2017], Pierre Zweigenbaum and Rapp [2018] aims to examine the ability of models to detect parallel sentence pairs in a pair of monolingual corpora. The dataset provides train and test splits in 5 languages. Following XTREME Hu et al. [2020], we directly evaluate on BUCC without fine-tuning and retrieve sentences with the highest cosine similarity.

**Tatoeba** The goal of the Tatoeba dataset Artetxe and Schwenk [2019] is to find the nearest neighbor for each sentence in the other language according to cosine similarity and compute the error rate. The dataset consists of up to 1,000 English-aligned sentence pairs covering 122 languages. Following XTREME Hu et al. [2020], we directly evaluate on Tatoeba without fine-tuning and retrieve sentences with the highest cosine similarity.

**XCOPA** In the Cross-lingual Choice of Plausible Alternatives dataset Ponti et al. [2020], each XCOPA instance corresponds to a premise and two alternatives. The task formulates as a binary

| Model   | en          | ar          | bg          | de          | el          | es          | fr          | hi          | ru          | sw          | th          | tr          | ur          | vi          | zh          | Avg.        |
|---------|-------------|-------------|-------------|-------------|-------------|-------------|-------------|-------------|-------------|-------------|-------------|-------------|-------------|-------------|-------------|-------------|
| XLM-R   | 88.6        | 84.5        | 86.7        | 84.6        | 85.2        | 84.7        | 82.0        | 82.5        | 82.6        | 82.4        | 80.6        | 83.1        | 80.3        | 77.3        | 77.2        | <b>82.8</b> |
| INFOXML | 90.4        | 83.9        | 85.8        | 86.0        | 85.6        | 87.8        | 86.9        | 83.9        | 83.5        | 83.3        | 81.2        | 84.6        | 82.7        | 81.6        | 75.7        | <b>84.2</b> |
| HICTL   | 90.6        | 86.8        | 88.2        | 87.4        | 87.0        | 87.4        | 85.0        | 83.9        | 83.3        | 84.8        | 83.1        | 85.7        | 82.8        | 79.7        | 80.9        | <b>85.1</b> |
| ChatGPT | 70.4        | 61.0        | 64.5        | 64.8        | 62.8        | 65.7        | 66.3        | 51.5        | 63.4        | 55.7        | 53.0        | 61.6        | 47.9        | 61.6        | 62.6        | <b>60.9</b> |
| EMMA-X  | <b>91.9</b> | <b>89.2</b> | <b>90.1</b> | <b>89.6</b> | <b>89.5</b> | <b>90.3</b> | <b>88.7</b> | <b>86.7</b> | <b>85.4</b> | <b>88.5</b> | <b>86.7</b> | <b>89.6</b> | <b>87.7</b> | <b>83.6</b> | <b>83.9</b> | <b>88.1</b> |

Table 4: XNLI results (accuracy) for each language.

classification to predict the more plausible choice. The English COPA Gordon et al. [2012] training set and Social IQa Sap et al. [2019] training data are used for fine-tuning, while the validation and test sets of English COPA are translated and re-annotated into 11 languages for evaluation.

**MultiEURLEX** The MultiEURLEX dataset Chalkidis et al. [2021] is a legal topic classification task which comprises 65k European Union (EU) laws in 23 official EU languages. The dataset provides multi-granular labels per document. The dataset is split into training, development, and test subsets chronologically, resulting in 55k training documents for 7 languages, and 5k each for development and test subsets in all 23 languages.

**MultiARC** The Multilingual Amazon Reviews Corpus Keung et al. [2020] is a large-scale collection of Amazon reviews for multilingual text classification in 6 languages. Different languages are directly gathered from the marketplaces in different countries. The goal is to predict the reviewer’s rating on the 5-star scale using the text of the review as input. The data is clearly split into training (200,000 reviews), development (5,000 reviews), and test sets (5,000 reviews) for each language.

**PAWS-X** The Cross-lingual Paraphrase Adversaries from Word Scrambling Yang et al. [2019b] dataset requires to identify whether two sentences are paraphrases. A subset of the evaluation pairs in English PAWS Zhang et al. [2019] are human-translated into 6 typologically distinct languages for evaluation, while the English PAWS training set is used for training.

## D Baseline Methods

To fairly evaluate the performance of EMMA-X, we choose XLM-R Conneau and Lample [2019] and its several derivatives as our baselines, which contain: (1) XLM-R, which applies multilingual MLM tasks as pre-training objectives on CCNet-100 corpus; (2) HICTL Wei et al. [2021], which continues training on XLM-R using hierarchical contrastive learning; and (3) INFOXML, which is initialized with XLM-R and trains with cross-lingual contrast, multilingual MLM and TLM. Also, we compare EMMA-X to strong sentence models: (1) S-BERT [Reimers and Gurevych, 2020], which adopts multilingual knowledge distillation to extend monolingual sentence representations to multilingual. We use the strongest baseline, **XLM-R** ← **SBERT-paraphrase**, proposed in the original paper as a baseline. (2) LaBSE [Feng et al., 2022], which systematically combines several best methods, including: masked language modeling, translation language modeling [Conneau and Lample, 2019], dual encoder translation ranking [Guo et al., 2018], and additive margin softmax [Yang et al., 2019a], to learn cross-lingual sentence representations. It filters 17B monolingual sentences and 6B translation pairs for sentence representation learning. We take the best model, LaBSE with Customized Vocab as our baseline. We further report the zero-shot results on Large Language Model (LLM), ChatGPT, which is trained on a wide variety of multilingual sentences and instruction tuning based on Reinforcement Learning with Human Feedback [Christiano et al., 2017, Ouyang et al., 2022].

## E Prompts for ChatGPT

In this section, we show the input prompts of ChatGPT on each task in Table 7.

| Model         | aym          | bzd          | cni          | gn           | hch          | nah          | oto          | quy          | shp          | tar          | Avg.         |
|---------------|--------------|--------------|--------------|--------------|--------------|--------------|--------------|--------------|--------------|--------------|--------------|
| XLM-R         | 49.01        | 50.61        | 41.72        | 58.34        | 42.46        | 54.63        | 35.57        | 59.29        | 51.62        | 41.54        | <b>48.48</b> |
| INFOXLM       | 49.87        | 51.29        | 42.41        | 58.83        | 43.07        | 55.25        | 36.14        | 59.87        | 52.20        | 42.12        | <b>49.10</b> |
| HICTL         | 49.65        | 51.22        | 42.36        | 58.82        | 43.09        | 55.13        | 36.04        | 59.61        | 52.17        | 42.08        | <b>49.02</b> |
| ChatGPT       | 42.0         | 43.6         | 40.8         | 40.4         | 40.0         | 43.8         | 41.1         | 43.1         | 42.0         | 40.0         | <b>41.7</b>  |
| <b>EMMA-X</b> | <b>51.19</b> | <b>52.50</b> | <b>43.62</b> | <b>59.88</b> | <b>44.31</b> | <b>55.44</b> | <b>39.16</b> | <b>60.14</b> | <b>52.84</b> | <b>43.10</b> | <b>50.21</b> |

Table 5: AmericasNLI (ANLI) results (top-1 accuracy) across different input languages.

| Model         | en-ar       | en-de       | en-tr       | en-es       | en-fr       | en-it       | en-nl       | ar-ar       | en-en       | es-es       | Avg.        |
|---------------|-------------|-------------|-------------|-------------|-------------|-------------|-------------|-------------|-------------|-------------|-------------|
| XLM-R         | 50.2        | 63.7        | 45.8        | 59.6        | 68.0        | 63.4        | 69.6        | 87.7        | 82.5        | 68.5        | <b>65.9</b> |
| INFOXLM       | 81.7        | 80.3        | 79.9        | 79.1        | 80.6        | 83.4        | 81.2        | 86.7        | 87.2        | 81.7        | <b>82.2</b> |
| HICTL         | 80.4        | 81.8        | 78.3        | 80.6        | 81.2        | 80.9        | 79.3        | 88.4        | 86.1        | 79.6        | <b>81.6</b> |
| <b>EMMA-X</b> | <b>86.6</b> | <b>85.0</b> | <b>87.1</b> | <b>84.4</b> | <b>85.2</b> | <b>89.4</b> | <b>88.3</b> | <b>90.9</b> | <b>92.0</b> | <b>84.5</b> | <b>87.3</b> |

Table 6: MultiSTS results (Spearman) across different input languages.

## F Results of each Language

We show the details for tasks and all languages in Tables 4 (XNLI), 5 (AmericasNLI), 6 (MultiSTS), 8 (QE), 9 (LAREQA), 10 (Mewsli-X), 11 (XCOPA), 12 (BUCC) and 13 (PAWS-X).

## G Equations and Theoretical Analysis

### G.1 Details of Equations

**Details of Gaussian Form  $\mathcal{N}_r$**  In EMMA-X, GMM classifier is introduced to determine the semantic rank of sentence pairs. The posterior probability  $P_G(\cdot)$  of GMM classifier is already discussed in Eq. 5. We show the explicit calculation of Gaussian form  $\mathcal{N}_r(\gamma^{(\mathbf{x}_i)}, \gamma^{(\mathbf{y}_k)})$  as:

$$\mathcal{N}_r(\gamma^{(\mathbf{x}_i)} - \gamma^{(\mathbf{y}_k)} | \mu_r, \sigma_r) = \frac{\pi_r}{(2\pi)^{(d/2)} |\text{diag}(\sigma_r)|} \cdot e^{\left( -\frac{1}{2} \left[ (\gamma^{(\mathbf{x}_i)} - \gamma^{(\mathbf{y}_k)}) - \mu_r \right]^T \text{diag}(\sigma_r^{-2}) \left[ (\gamma^{(\mathbf{x}_i)} - \gamma^{(\mathbf{y}_k)}) - \mu_r \right] \right)}, \quad (4)$$

where  $d$  is the dimension of hidden states of  $\gamma^{(\mathbf{x}_i)}$  and  $\gamma^{(\mathbf{y}_k)}$ .

**Details of contrastive learning** The training objective of cross-lingual encoder in EMMA-X is the ranking InfoNCE loss. We show the explicit expansion of this loss (Eq. 7) as:

$$\begin{aligned}
\mathcal{L}_{\text{CTL}}(\mathcal{X}, \mathcal{Y}; \Theta_{\mathcal{M}}) = & -\mathbb{E}_{\mathbf{x}_i \sim \mathcal{X}} \left[ \right. \\
& \underbrace{\log \frac{\sum_{\mathbf{y}_k \sim \mathcal{Y}_{c_{\mathcal{G}}^* = 1}} e^{\frac{s[\gamma(\mathbf{x}_i), \gamma(\mathbf{y}_k)]}{\tau_1}}}{\sum_{\mathbf{y}_t \sim \mathcal{Y}_{c_{\mathcal{G}}^* = 1}} e^{\frac{s[\gamma(\mathbf{x}_i), \gamma(\mathbf{y}_t)]}{\tau_1}} + \sum_{\mathbf{y}_t \sim \mathcal{Y}_{c_{\mathcal{G}}^* = 2}} e^{\frac{s[\gamma(\mathbf{x}_i), \gamma(\mathbf{y}_t)]}{\tau_1}} + \dots + \sum_{\mathbf{y}_t \sim \mathcal{Y}_{c_{\mathcal{G}}^* = 4}} e^{\frac{s[\gamma(\mathbf{x}_i), \gamma(\mathbf{y}_t)]}{\tau_1}}}}_{\ell_1} \\
& + \log \frac{\sum_{\mathbf{y}_k \sim \mathcal{Y}_{c_{\mathcal{G}}^* = 2}} e^{\frac{s[\gamma(\mathbf{x}_i), \gamma(\mathbf{y}_k)]}{\tau_2}}}{\sum_{\mathbf{y}_t \sim \mathcal{Y}_{c_{\mathcal{G}}^* = 2}} e^{\frac{s[\gamma(\mathbf{x}_i), \gamma(\mathbf{y}_t)]}{\tau_2}} + \sum_{\mathbf{y}_t \sim \mathcal{Y}_{c_{\mathcal{G}}^* = 3}} e^{\frac{s[\gamma(\mathbf{x}_i), \gamma(\mathbf{y}_t)]}{\tau_2}} + \sum_{\mathbf{y}_t \sim \mathcal{Y}_{c_{\mathcal{G}}^* = 4}} e^{\frac{s[\gamma(\mathbf{x}_i), \gamma(\mathbf{y}_t)]}{\tau_2}}}}_{\ell_2} \\
& \left. + \log \frac{\sum_{\mathbf{y}_k \sim \mathcal{Y}_{c_{\mathcal{G}}^* = 3}} e^{\frac{s[\gamma(\mathbf{x}_i), \gamma(\mathbf{y}_k)]}{\tau_3}}}{\sum_{\mathbf{y}_t \sim \mathcal{Y}_{c_{\mathcal{G}}^* = 3}} e^{\frac{s[\gamma(\mathbf{x}_i), \gamma(\mathbf{y}_t)]}{\tau_3}} + \sum_{\mathbf{y}_t \sim \mathcal{Y}_{c_{\mathcal{G}}^* = 4}} e^{\frac{s[\gamma(\mathbf{x}_i), \gamma(\mathbf{y}_t)]}{\tau_3}}}}_{\ell_3} \right], \tag{5}
\end{aligned}$$

where  $\tau_r$  represents the temperature term. As small temperature  $\tau$  tends to be less tolerant to similar samples, and large  $\tau$  tends to cluster similar samples together [Wang and Liu, 2021], we empirically set  $\tau_1 < \tau_2 < \tau_3 < \tau_4$ , which remains the same as Hoffmann et al. [2022].

## G.2 Theoretical Analysis

In this section, we provide detailed proof for Eq. 14 and Eq. 15. Next, we prove the feasibility of our dual supervision. GMM classifier clusters sentence pairs in terms of Euclidean distance, while cross-lingual encoder minimizes the covariance of each semantic relation rank via cosine distance. Finally, we prove that these two metrics are actually equivalent to each other in the unit hypersphere of the embedding space.

**Proof of Eq. 14.** We provide the derivation of Eq. 14. With the assumption that  $P(\mathbf{x}_i, \mathbf{y}_k | c_{\mathcal{G}}^* = r, \Theta) \sim \mathcal{N}_r(\mathbf{x}_i - \mathbf{y}_k | \tilde{\mu}_r, \tilde{\sigma}_r)$ , we have,

$$\begin{aligned}
\sum_{\mathbf{x}_i \in \mathcal{X}} \sum_{\mathbf{y}_k \in \mathcal{Y}} \sum_{r=1}^N Q(r) \log \frac{P(\mathbf{x}_i, \mathbf{y}_k, r | \Theta)}{Q(r)} & \approx \sum_{\mathbf{x}_i \in \mathcal{X}} \sum_{\mathbf{y}_k \in \mathcal{Y}} \sum_{r=1}^N \log P(\mathbf{x}_i, \mathbf{y}_k | c_{\mathcal{G}}^* = r, \Theta) \\
& = \sum_{\mathbf{x}_i \in \mathcal{X}} \sum_{\mathbf{y}_k \in \mathcal{Y}} \sum_{r=1}^N \left( \log \left( \frac{1}{(2\pi)^{(d/2)} |\tilde{\sigma}_r|^{1/2}} \right) \right. \\
& \quad \left. + \frac{1}{2} [(\mathbf{x}_i - \mathbf{y}_k) - \tilde{\mu}_r]^T \tilde{\sigma}_r^{-1} [(\mathbf{x}_i - \mathbf{y}_k) - \tilde{\mu}_r] \right) \\
& \geq \sum_{r=1}^N \left[ \sum_{\mathbf{x}_i \in \mathcal{X}} \sum_{\mathbf{y}_k \in \mathcal{Y}} (\mathbf{x}_i - \mathbf{y}_k)^2 - 2\tilde{\mu}_r \sum_{\mathbf{x}_i \in \mathcal{X}} \sum_{\mathbf{y}_k \in \mathcal{Y}} (\mathbf{x}_i - \mathbf{y}_k) + n\tilde{\mu}_r^2 \right] \\
& = \sum_{r=1}^N n^2 \tilde{\mu}_r^2 - n\tilde{\mu}_r^2 \\
& = n(n-1) \sum_{r=1}^N \tilde{\mu}_r^2, \tag{6}
\end{aligned}$$

with  $n$  denoting the number of sentence pairs in semantic rank  $r$ . Here, we ignore the impact of  $\tilde{\sigma}_r$ .

**Proof of Eq. 15.** As we apply dual supervision, data in the contrastive label space also follows the distribution  $\mathcal{N}_r(\mathbf{x}_i - \mathbf{y}_k | \tilde{\mu}_r, \tilde{\sigma}_r)$ . Hence, under mild assumptions, we can get:

$$\begin{aligned}
\mathcal{L}_{\text{CTL}}^+(\mathcal{X}, \mathcal{Y}; \Theta_{\mathcal{M}}) &= \mathbb{E}_{\mathbf{x}_i \sim \mathcal{X}} \sum_{r=1}^{N-1} \log \sum_{\mathbf{y}_k \sim \mathcal{Y}_{c_{\mathcal{G}}^*=r}} e^{s[\gamma^{(\mathbf{x}_i)}, \gamma^{(\mathbf{y}_k)}]} \\
&= \sum_{\mathbf{x}_i \in \mathcal{X}} \sum_{\mathbf{y}_k \in \mathcal{Y}} \sum_{r=1}^{N-1} s(\mathbf{x}_i, \mathbf{y}_k) \\
&= \sum_{\mathbf{x}_i \in \mathcal{X}} \sum_{\mathbf{y}_k \in \mathcal{Y}} \sum_{r=1}^{N-1} \frac{(\mathbf{x}_i - \mathbf{y}_k)^2 - 2}{2} \\
&= n^2 \sum_{r=1}^{N-1} \tilde{\mu}_r^2.
\end{aligned} \tag{7}$$

Based on the definition of semantic ranks, we have  $\tilde{\mu}_1 < \tilde{\mu}_2 < \dots < \tilde{\mu}_N$ . Empirically, the number of sentence pairs in each rank  $n$  is larger than the number of semantic ranks  $N$ . Hence, it can be derived that:

$$\begin{aligned}
\mathcal{L}_{\text{CTL}}^+(\mathcal{X}, \mathcal{Y}; \Theta_{\mathcal{M}}) &= n^2 \sum_{r=1}^{N-1} \tilde{\mu}_r^2 \\
&< n^2 \sum_{r=1}^{N-1} \tilde{\mu}_r^2 + n^2 \tilde{\mu}_N^2 - n \sum_{r=1}^N \tilde{\mu}_r^2 \\
&= n(n-1) \sum_{r=1}^N \tilde{\mu}_r^2 \\
&\leq \sum_{\mathbf{x}_i \in \mathcal{X}} \sum_{\mathbf{y}_k \in \mathcal{Y}} \sum_{r=1}^N Q(r) \log \frac{P(\mathbf{x}_i, \mathbf{y}_k, r | \Theta)}{Q(r)}.
\end{aligned} \tag{8}$$

160 Therefore, we prove that minimizing the positive terms  $\mathcal{L}_{\text{CTL}}^+(\mathcal{X}, \mathcal{Y}; \Theta_{\mathcal{M}})$  in contrastive learning is  
161 equivalent to maximizing a lower bound of the likelihood in Eq. 12.

**Feasibility of Dual Supervision** According to the definition of semantic ranks, the approximated semantic rank  $c_{\mathcal{G}}^*$  from GMM classifier should satisfy the following restriction,

$$\mathbb{E}_{\mathbf{y}_k \sim \mathcal{Y}_{c_{\mathcal{G}}^*=1}} \|\gamma^{(\mathbf{x}_i)} - \gamma^{(\mathbf{y}_k)}\| < \mathbb{E}_{\mathbf{y}_k \sim \mathcal{Y}_{c_{\mathcal{G}}^*=2}} \|\gamma^{(\mathbf{x}_i)} - \gamma^{(\mathbf{y}_k)}\| < \dots < \mathbb{E}_{\mathbf{y}_k \sim \mathcal{Y}_{c_{\mathcal{G}}^*=N}} \|\gamma^{(\mathbf{x}_i)} - \gamma^{(\mathbf{y}_k)}\|. \tag{9}$$

162 Similarly, the approximated semantic rank  $c_{\mathcal{M}}^*$  from cross-lingual encoder should satisfy the following  
163 restriction,

$$\mathbb{E}_{\mathbf{y}_k \sim \mathcal{Y}_{c_{\mathcal{M}}^*=1}} s[\gamma^{(\mathbf{x}_i)}, \gamma^{(\mathbf{y}_k)}] > \mathbb{E}_{\mathbf{y}_k \sim \mathcal{Y}_{c_{\mathcal{M}}^*=2}} s[\gamma^{(\mathbf{x}_i)}, \gamma^{(\mathbf{y}_k)}] > \dots > \mathbb{E}_{\mathbf{y}_k \sim \mathcal{Y}_{c_{\mathcal{M}}^*=N}} s[\gamma^{(\mathbf{x}_i)}, \gamma^{(\mathbf{y}_k)}]. \tag{10}$$

Next, we prove that these two restrictions are interchangeable with each other in a unit hypersphere. For simplicity, we consider only two ranks, but extending the explanation to more ranks is trivial. As the Euclidean distance is always larger than 0, we have:

$$\begin{aligned}
&\mathbb{E}_{\mathbf{y}_k \sim \mathcal{Y}_{c_{\mathcal{G}}^*=1}} \|\gamma^{(\mathbf{x}_i)} - \gamma^{(\mathbf{y}_k)}\| < \mathbb{E}_{\mathbf{y}_k \sim \mathcal{Y}_{c_{\mathcal{G}}^*=2}} \|\gamma^{(\mathbf{x}_i)} - \gamma^{(\mathbf{y}_k)}\| \\
&\Leftrightarrow \mathbb{E}_{\mathbf{y}_k \sim \mathcal{Y}_{c_{\mathcal{G}}^*=1}} (\gamma^{(\mathbf{x}_i)} - \gamma^{(\mathbf{y}_k)})^2 < \mathbb{E}_{\mathbf{y}_k \sim \mathcal{Y}_{c_{\mathcal{G}}^*=2}} (\gamma^{(\mathbf{x}_i)} - \gamma^{(\mathbf{y}_k)})^2 \\
&\Leftrightarrow \mathbb{E}_{\mathbf{y}_k \sim \mathcal{Y}_{c_{\mathcal{G}}^*=1}} (2 - 2\gamma^{(\mathbf{x}_i)}\gamma^{(\mathbf{y}_k)}) < \mathbb{E}_{\mathbf{y}_k \sim \mathcal{Y}_{c_{\mathcal{G}}^*=2}} (2 - 2\gamma^{(\mathbf{x}_i)}\gamma^{(\mathbf{y}_k)}) \tag{11} \\
&\Leftrightarrow \mathbb{E}_{\mathbf{y}_k \sim \mathcal{Y}_{c_{\mathcal{G}}^*=1}} s[\gamma^{(\mathbf{x}_i)}, \gamma^{(\mathbf{y}_k)}] > \mathbb{E}_{\mathbf{y}_k \sim \mathcal{Y}_{c_{\mathcal{G}}^*=2}} s[\gamma^{(\mathbf{x}_i)}, \gamma^{(\mathbf{y}_k)}] \\
&\Leftrightarrow \mathbb{E}_{\mathbf{y}_k \sim \mathcal{Y}_{c_{\mathcal{M}}^*=1}} s[\gamma^{(\mathbf{x}_i)}, \gamma^{(\mathbf{y}_k)}] > \mathbb{E}_{\mathbf{y}_k \sim \mathcal{Y}_{c_{\mathcal{M}}^*=2}} s[\gamma^{(\mathbf{x}_i)}, \gamma^{(\mathbf{y}_k)}].
\end{aligned}$$

164 From the above analyses, we can tell that the approximated semantic rank from one module can  
165 provide a reasonable supervision signal to guide the training of the other module. Hence, all sentence  
166 pairs will be uniformly distributed according to a unified ranking semantic similarity in the embedding  
167 space.



## References

- Omri Abend and Ari Rappoport. The state of the art in semantic representation. In *Proceedings of the 55th Annual Meeting of the Association for Computational Linguistics (Volume 1: Long Papers)*, pages 77–89, Vancouver, Canada, July 2017. Association for Computational Linguistics. doi: 10.18653/v1/P17-1008. URL <https://aclanthology.org/P17-1008>.
- Farhad Akhbardeh, Arkady Arkhangorodsky, Magdalena Biesialska, Ondřej Bojar, Rajen Chatterjee, Vishrav Chaudhary, Marta R. Costa-jussa, Cristina España-Bonet, Angela Fan, Christian Federmann, Markus Freitag, Yvette Graham, Roman Grundkiewicz, Barry Haddow, Leonie Harter, Kenneth Heafield, Christopher Homan, Matthias Huck, Kwabena Amponsah-Kaakyire, Jungo Kasai, Daniel Khashabi, Kevin Knight, Tom Kocmi, Philipp Koehn, Nicholas Lourie, Christof Monz, Makoto Morishita, Masaaki Nagata, Ajay Nagesh, Toshiaki Nakazawa, Matteo Negri, Santanu Pal, Allahsera Auguste Tapo, Marco Turchi, Valentin Vydin, and Marcos Zampieri. Findings of the 2021 conference on machine translation (WMT21). In *Proceedings of the Sixth Conference on Machine Translation*, pages 1–88, Online, November 2021. Association for Computational Linguistics. URL <https://aclanthology.org/2021.wmt-1.1>.
- Mikel Artetxe and Holger Schwenk. Massively multilingual sentence embeddings for zero-shot cross-lingual transfer and beyond. *Transactions of the Association for Computational Linguistics*, 7:597–610, 2019. doi: 10.1162/tacl\_a\_00288. URL <https://aclanthology.org/Q19-1038>.
- Mikel Artetxe, Sebastian Ruder, and Dani Yogatama. On the cross-lingual transferability of monolingual representations. In *Proceedings of the 58th Annual Meeting of the Association for Computational Linguistics*, pages 4623–4637, Online, July 2020. Association for Computational Linguistics. doi: 10.18653/v1/2020.acl-main.421. URL <https://aclanthology.org/2020.acl-main.421>.
- Jan A. Botha, Zifei Shan, and Daniel Gillick. Entity Linking in 100 Languages. In *Proceedings of the 2020 Conference on Empirical Methods in Natural Language Processing (EMNLP)*, pages 7833–7845, Online, November 2020. Association for Computational Linguistics. doi: 10.18653/v1/2020.emnlp-main.630. URL <https://aclanthology.org/2020.emnlp-main.630>.
- Samuel R. Bowman, Gabor Angeli, Christopher Potts, and Christopher D. Manning. A large annotated corpus for learning natural language inference. In *Proceedings of the 2015 Conference on Empirical Methods in Natural Language Processing*, pages 632–642, Lisbon, Portugal, September 2015. Association for Computational Linguistics. doi: 10.18653/v1/D15-1075. URL <https://www.aclweb.org/anthology/D15-1075>.
- T. Caliński and J Harabasz. A dendrite method for cluster analysis. *Communications in Statistics*, 3(1):1–27, 1974. doi: 10.1080/03610927408827101. URL <https://www.tandfonline.com/doi/abs/10.1080/03610927408827101>.
- Daniel Cer, Mona Diab, Eneko Agirre, Iñigo Lopez-Gazpio, and Lucia Specia. SemEval-2017 task 1: Semantic textual similarity multilingual and crosslingual focused evaluation. In *Proceedings of the 11th International Workshop on Semantic Evaluation (SemEval-2017)*, pages 1–14, Vancouver, Canada, August 2017. Association for Computational Linguistics. doi: 10.18653/v1/S17-2001. URL <https://aclanthology.org/S17-2001>.
- Ilias Chalkidis, Manos Fergadiotis, and Ion Androutsopoulos. MultiEURLEX - a multi-lingual and multi-label legal document classification dataset for zero-shot cross-lingual transfer. In *Proceedings of the 2021 Conference on Empirical Methods in Natural Language Processing*, pages 6974–6996, Online and Punta Cana, Dominican Republic, November 2021. Association for Computational Linguistics. doi: 10.18653/v1/2021.emnlp-main.559. URL <https://aclanthology.org/2021.emnlp-main.559>.
- Zewen Chi, Li Dong, Furu Wei, Nan Yang, Saksham Singhal, Wenhui Wang, Xia Song, Xian-Ling Mao, Heyan Huang, and Ming Zhou. InfoXLM: An information-theoretic framework for cross-lingual language model pre-training. In *Proceedings of the 2021 Conference of the North American Chapter of the Association for Computational Linguistics: Human Language Technologies*, pages 3576–3588, Online, June 2021. Association for Computational Linguistics. doi: 10.18653/v1/2021.naacl-main.280. URL <https://aclanthology.org/2021.naacl-main.280>.

- 220 Paul F Christiano, Jan Leike, Tom Brown, Miljan Martic, Shane Legg, and Dario Amodei. Deep rein-  
221 forcement learning from human preferences. In I. Guyon, U. Von Luxburg, S. Bengio, H. Wallach,  
222 R. Fergus, S. Vishwanathan, and R. Garnett, editors, *Advances in Neural Information Processing*  
223 *Systems*, volume 30. Curran Associates, Inc., 2017. URL [https://proceedings.neurips.cc/  
224 paper\\_files/paper/2017/file/d5e2c0adad503c91f91df240d0cd4e49-Paper.pdf](https://proceedings.neurips.cc/paper_files/paper/2017/file/d5e2c0adad503c91f91df240d0cd4e49-Paper.pdf).
- 225 Alexis Conneau and Guillaume Lample. Cross-lingual language model pretraining. In  
226 H. Wallach, H. Larochelle, A. Beygelzimer, F. d'Alché-Buc, E. Fox, and R. Gar-  
227 nett, editors, *Advances in Neural Information Processing Systems*, volume 32. Curran  
228 Associates, Inc., 2019. URL [https://proceedings.neurips.cc/paper/2019/file/  
229 c04c19c2c2474dbf5f7ac4372c5b9af1-Paper.pdf](https://proceedings.neurips.cc/paper/2019/file/c04c19c2c2474dbf5f7ac4372c5b9af1-Paper.pdf).
- 230 Alexis Conneau, Ruty Rinott, Guillaume Lample, Adina Williams, Samuel Bowman, Holger Schwenk,  
231 and Veselin Stoyanov. XNLI: Evaluating cross-lingual sentence representations. In *Proceedings of*  
232 *the 2018 Conference on Empirical Methods in Natural Language Processing*, pages 2475–2485,  
233 Brussels, Belgium, October–November 2018. Association for Computational Linguistics. doi:  
234 10.18653/v1/D18-1269. URL <https://www.aclweb.org/anthology/D18-1269>.
- 235 Alexis Conneau, Kartikay Khandelwal, Naman Goyal, Vishrav Chaudhary, Guillaume Wenzek,  
236 Francisco Guzmán, Edouard Grave, Myle Ott, Luke Zettlemoyer, and Veselin Stoyanov. Un-  
237 supervised cross-lingual representation learning at scale. In *Proceedings of the 58th Annual*  
238 *Meeting of the Association for Computational Linguistics*, pages 8440–8451, Online, July  
239 2020. Association for Computational Linguistics. doi: 10.18653/v1/2020.acl-main.747. URL  
240 <https://aclanthology.org/2020.acl-main.747>.
- 241 Marta R Costa-jussà, James Cross, Onur Çelebi, Maha Elbayad, Kenneth Heafield, Kevin Heffernan,  
242 Elahe Kalbassi, Janice Lam, Daniel Licht, Jean Maillard, et al. No language left behind: Scaling  
243 human-centered machine translation. *arXiv preprint arXiv:2207.04672*, 2022.
- 244 Abteen Ebrahimi, Manuel Mager, Arturo Oncevay, Vishrav Chaudhary, Luis Chiruzzo, Angela  
245 Fan, John Ortega, Ricardo Ramos, Annette Rios, Ivan Vladimir Meza Ruiz, Gustavo Giménez-  
246 Lugo, Elisabeth Mager, Graham Neubig, Alexis Palmer, Rolando Coto-Solano, Thang Vu, and  
247 Katharina Kann. AmericasNLI: Evaluating zero-shot natural language understanding of pretrained  
248 multilingual models in truly low-resource languages. In *Proceedings of the 60th Annual Meeting*  
249 *of the Association for Computational Linguistics (Volume 1: Long Papers)*, pages 6279–6299,  
250 Dublin, Ireland, May 2022. Association for Computational Linguistics. doi: 10.18653/v1/2022.  
251 acl-long.435. URL <https://aclanthology.org/2022.acl-long.435>.
- 252 Ahmed El-Kishky, Vishrav Chaudhary, Francisco Guzmán, and Philipp Koehn. CCAI: A  
253 massive collection of cross-lingual web-document pairs. In *Proceedings of the 2020 Conference*  
254 *on Empirical Methods in Natural Language Processing (EMNLP)*, pages 5960–5969, Online,  
255 November 2020. Association for Computational Linguistics. doi: 10.18653/v1/2020.emnlp-main.  
256 480. URL <https://aclanthology.org/2020.emnlp-main.480>.
- 257 Fangxiaoyu Feng, Yinfei Yang, Daniel Cer, Naveen Arivazhagan, and Wei Wang. Language-agnostic  
258 BERT sentence embedding. In *Proceedings of the 60th Annual Meeting of the Association*  
259 *for Computational Linguistics (Volume 1: Long Papers)*, pages 878–891, Dublin, Ireland, May  
260 2022. Association for Computational Linguistics. doi: 10.18653/v1/2022.acl-long.62. URL  
261 <https://aclanthology.org/2022.acl-long.62>.
- 262 Andrew Gordon, Zornitsa Kozareva, and Melissa Roemmele. SemEval-2012 task 7: Choice of  
263 plausible alternatives: An evaluation of commonsense causal reasoning. In *\*SEM 2012: The First*  
264 *Joint Conference on Lexical and Computational Semantics – Volume 1: Proceedings of the main*  
265 *conference and the shared task, and Volume 2: Proceedings of the Sixth International Workshop*  
266 *on Semantic Evaluation (SemEval 2012)*, pages 394–398, Montréal, Canada, 7–8 June 2012.  
267 Association for Computational Linguistics. URL <https://aclanthology.org/S12-1052>.
- 268 Naman Goyal, Cynthia Gao, Vishrav Chaudhary, Peng-Jen Chen, Guillaume Wenzek, Da Ju, Sanjana  
269 Krishnan, Marc’Aurelio Ranzato, Francisco Guzmán, and Angela Fan. The Flores-101 evaluation  
270 benchmark for low-resource and multilingual machine translation. *Transactions of the Association*  
271 *for Computational Linguistics*, 10:522–538, 2022. doi: 10.1162/tacl\_a\_00474. URL <https://aclanthology.org/2022.tacl-1.30>.

- 273 Mandy Guo, Qinlan Shen, Yinfei Yang, Heming Ge, Daniel Cer, Gustavo Hernandez Abrego,  
274 Keith Stevens, Noah Constant, Yun-Hsuan Sung, Brian Strope, and Ray Kurzweil. Effective  
275 parallel corpus mining using bilingual sentence embeddings. In *Proceedings of the Third Con-*  
276 *ference on Machine Translation: Research Papers*, pages 165–176, Brussels, Belgium, Oc-  
277 tober 2018. Association for Computational Linguistics. doi: 10.18653/v1/W18-6317. URL  
278 <https://aclanthology.org/W18-6317>.
- 279 Kaiming He, Haoqi Fan, Yuxin Wu, Saining Xie, and Ross Girshick. Momentum contrast for  
280 unsupervised visual representation learning. In *2020 IEEE/CVF Conference on Computer Vision*  
281 *and Pattern Recognition (CVPR)*, pages 9726–9735. IEEE Computer Society, 2020.
- 282 David T Hoffmann, N Behrmann, J Gall, Thomas Brox, and M Noroozi. Ranking info noise  
283 contrastive estimation: Boosting contrastive learning via ranked positives. In *AAAI Conference on*  
284 *Artificial Intelligence*, 2022.
- 285 Junjie Hu, Sebastian Ruder, Aditya Siddhant, Graham Neubig, Orhan Firat, and Melvin Johnson.  
286 XTREME: A massively multilingual multi-task benchmark for evaluating cross-lingual generalisa-  
287 tion. In Hal Daumé III and Aarti Singh, editors, *Proceedings of the 37th International Conference*  
288 *on Machine Learning*, volume 119 of *Proceedings of Machine Learning Research*, pages 4411–  
289 4421. PMLR, 13–18 Jul 2020. URL <https://proceedings.mlr.press/v119/hu20b.html>.
- 290 Haoyang Huang, Yaobo Liang, Nan Duan, Ming Gong, Linjun Shou, Daxin Jiang, and Ming Zhou.  
291 Unicoder: A universal language encoder by pre-training with multiple cross-lingual tasks. In  
292 *Proceedings of the 2019 Conference on Empirical Methods in Natural Language Processing and*  
293 *the 9th International Joint Conference on Natural Language Processing (EMNLP-IJCNLP)*, pages  
294 2485–2494, Hong Kong, China, November 2019. Association for Computational Linguistics. doi:  
295 10.18653/v1/D19-1252. URL <https://aclanthology.org/D19-1252>.
- 296 Jeannie Y Irwin, Henk Harkema, Lee M Christensen, Titus Schleyer, Peter J Haug, and Wendy W  
297 Chapman. Methodology to develop and evaluate a semantic representation for nlp. In *AMIA Annual*  
298 *Symposium Proceedings*, volume 2009, page 271. American Medical Informatics Association,  
299 2009.
- 300 Fabio Kepler, Jonay Trénous, Marcos Treviso, Miguel Vera, and André F. T. Martins. OpenKiwi:  
301 An open source framework for quality estimation. In *Proceedings of the 57th Annual Meeting of*  
302 *the Association for Computational Linguistics: System Demonstrations*, pages 117–122, Florence,  
303 Italy, July 2019. Association for Computational Linguistics. doi: 10.18653/v1/P19-3020. URL  
304 <https://aclanthology.org/P19-3020>.
- 305 Phillip Keung, Yichao Lu, György Szarvas, and Noah A. Smith. The multilingual Amazon reviews  
306 corpus. In *Proceedings of the 2020 Conference on Empirical Methods in Natural Language*  
307 *Processing (EMNLP)*, pages 4563–4568, Online, November 2020. Association for Computational  
308 Linguistics. doi: 10.18653/v1/2020.emnlp-main.369. URL <https://aclanthology.org/2020.emnlp-main.369>.
- 310 Diederik P. Kingma and Jimmy Ba. Adam: A method for stochastic optimization. In *3rd International*  
311 *Conference on Learning Representations, San Diego, CA*, 2015. URL [http://arxiv.org/abs/](http://arxiv.org/abs/1412.6980)  
312 1412.6980.
- 313 Taku Kudo and John Richardson. SentencePiece: A simple and language independent subword  
314 tokenizer and detokenizer for neural text processing. In *Proceedings of the 2018 Conference*  
315 *on Empirical Methods in Natural Language Processing: System Demonstrations*, pages 66–71,  
316 Brussels, Belgium, November 2018. Association for Computational Linguistics. doi: 10.18653/v1/  
317 D18-2012. URL <https://aclanthology.org/D18-2012>.
- 318 S. Kullback and R. A. Leibler. On Information and Sufficiency. *The Annals of Mathematical Statistics*,  
319 22(1):79 – 86, 1951. doi: 10.1214/aoms/1177729694. URL [https://doi.org/10.1214/aoms/](https://doi.org/10.1214/aoms/1177729694)  
320 1177729694.
- 321 Fuli Luo, Wei Wang, Jiahao Liu, Yijia Liu, Bin Bi, Songfang Huang, Fei Huang, and Luo Si.  
322 VECO: Variable and flexible cross-lingual pre-training for language understanding and generation.  
323 In *Proceedings of the 59th Annual Meeting of the Association for Computational Linguistics*

- 324 *and the 11th International Joint Conference on Natural Language Processing (Volume 1: Long*  
 325 *Papers)*, pages 3980–3994, Online, August 2021. Association for Computational Linguistics. doi:  
 326 10.18653/v1/2021.acl-long.308. URL <https://aclanthology.org/2021.acl-long.308>.
- 327 Jiaqi Mu and Pramod Viswanath. All-but-the-top: Simple and effective postprocessing for word  
 328 representations. In *International Conference on Learning Representations*, 2018. URL <https://openreview.net/forum?id=HkuGJ3kCb>.
- 330 Long Ouyang, Jeffrey Wu, Xu Jiang, Diogo Almeida, Carroll Wainwright, Pamela Mishkin, Chong  
 331 Zhang, Sandhini Agarwal, Katarina Slama, Alex Gray, John Schulman, Jacob Hilton, Fraser Kelton,  
 332 Luke Miller, Maddie Simens, Amanda Askell, Peter Welinder, Paul Christiano, Jan Leike, and  
 333 Ryan Lowe. Training language models to follow instructions with human feedback. In Alice H. Oh,  
 334 Alekh Agarwal, Danielle Belgrave, and Kyunghyun Cho, editors, *Advances in Neural Information*  
 335 *Processing Systems*, 2022. URL <https://openreview.net/forum?id=TG8KACxEON>.
- 336 Serge Sharoff Pierre Zweigenbaum and Reinhard Rapp. Overview of the third bucc shared task:  
 337 Spotting parallel sentences in comparable corpora. In Reinhard Rapp, Pierre Zweigenbaum,  
 338 and Serge Sharoff, editors, *Proceedings of the Eleventh International Conference on Language*  
 339 *Resources and Evaluation (LREC 2018)*, Paris, France, may 2018. European Language Resources  
 340 Association (ELRA). ISBN 979-10-95546-07-8.
- 341 Edoardo Maria Ponti, Goran Glavaš, Olga Majewska, Qianchu Liu, Ivan Vulić, and Anna Korhonen.  
 342 XCOPA: A multilingual dataset for causal commonsense reasoning. In *Proceedings of the 2020*  
 343 *Conference on Empirical Methods in Natural Language Processing (EMNLP)*, pages 2362–2376,  
 344 Online, November 2020. Association for Computational Linguistics. doi: 10.18653/v1/2020.  
 345 emnlp-main.185. URL <https://aclanthology.org/2020.emnlp-main.185>.
- 346 Pranav Rajpurkar, Jian Zhang, Konstantin Lopyrev, and Percy Liang. SQuAD: 100,000+ questions  
 347 for machine comprehension of text. In *Proceedings of the 2016 Conference on Empirical Methods*  
 348 *in Natural Language Processing*, pages 2383–2392, Austin, Texas, November 2016. Association  
 349 for Computational Linguistics. doi: 10.18653/v1/D16-1264. URL <https://aclanthology.org/D16-1264>.
- 351 Nils Reimers and Iryna Gurevych. Making monolingual sentence embeddings multilingual us-  
 352 ing knowledge distillation. In *Proceedings of the 2020 Conference on Empirical Methods in*  
 353 *Natural Language Processing (EMNLP)*, pages 4512–4525, Online, November 2020. Associ-  
 354 ation for Computational Linguistics. doi: 10.18653/v1/2020.emnlp-main.365. URL <https://aclanthology.org/2020.emnlp-main.365>.
- 356 Uma Roy, Noah Constant, Rami Al-Rfou, Aditya Barua, Aaron Phillips, and Yinfei Yang. LARQA:  
 357 Language-agnostic answer retrieval from a multilingual pool. In *Proceedings of the 2020 Confer-*  
 358 *ence on Empirical Methods in Natural Language Processing (EMNLP)*, pages 5919–5930, Online,  
 359 November 2020. Association for Computational Linguistics. doi: 10.18653/v1/2020.emnlp-main.  
 360 477. URL <https://aclanthology.org/2020.emnlp-main.477>.
- 361 Sebastian Ruder, Noah Constant, Jan Botha, Aditya Siddhant, Orhan Firat, Jinlan Fu, Pengfei Liu,  
 362 Junjie Hu, Dan Garrette, Graham Neubig, and Melvin Johnson. XTREME-R: Towards more  
 363 challenging and nuanced multilingual evaluation. In *Proceedings of the 2021 Conference on*  
 364 *Empirical Methods in Natural Language Processing*, pages 10215–10245, Online and Punta Cana,  
 365 Dominican Republic, November 2021. Association for Computational Linguistics. doi: 10.18653/  
 366 v1/2021.emnlp-main.802. URL <https://aclanthology.org/2021.emnlp-main.802>.
- 367 Maarten Sap, Hannah Rashkin, Derek Chen, Ronan Le Bras, and Yejin Choi. Social IQa: Com-  
 368 monsense reasoning about social interactions. In *Proceedings of the 2019 Conference on Em-*  
 369 *pirical Methods in Natural Language Processing and the 9th International Joint Conference*  
 370 *on Natural Language Processing (EMNLP-IJCNLP)*, pages 4463–4473, Hong Kong, China,  
 371 November 2019. Association for Computational Linguistics. doi: 10.18653/v1/D19-1454. URL  
 372 <https://aclanthology.org/D19-1454>.
- 373 Holger Schwenk, Guillaume Wenzek, Sergey Edunov, Edouard Grave, Armand Joulin, and Angela  
 374 Fan. CCMatrix: Mining billions of high-quality parallel sentences on the web. In *Proceedings of the*  
 375 *59th Annual Meeting of the Association for Computational Linguistics and the 11th International*

- 376 *Joint Conference on Natural Language Processing (Volume 1: Long Papers)*, pages 6490–6500,  
377 Online, August 2021. Association for Computational Linguistics. doi: 10.18653/v1/2021.acl-long.  
378 507. URL <https://aclanthology.org/2021.acl-long.507>.
- 379 Lucia Specia, Frédéric Blain, Marina Fomicheva, Chrysoula Zerva, Zhenhao Li, Vishrav Chaudhary,  
380 and André F. T. Martins. Findings of the WMT 2021 shared task on quality estimation. In  
381 *Proceedings of the Sixth Conference on Machine Translation*, pages 684–725, Online, November  
382 2021. Association for Computational Linguistics. URL <https://aclanthology.org/2021.wmt-1.71>.
- 384 Virginia Teller. Speech and Language Processing: An Introduction to Natural Language Processing,  
385 Computational Linguistics, and Speech Recognition. *Computational Linguistics*, 26(4):638–641,  
386 12 2000. ISSN 0891-2017. doi: 10.1162/089120100750105975. URL <https://doi.org/10.1162/089120100750105975>.
- 388 Nattapong Tiyajamorn, Tomoyuki Kajiwara, Yuki Arase, and Makoto Onizuka. Language-  
389 agnostic representation from multilingual sentence encoders for cross-lingual similarity esti-  
390 mation. In *Proceedings of the 2021 Conference on Empirical Methods in Natural Language*  
391 *Processing*, pages 7764–7774, Online and Punta Cana, Dominican Republic, November 2021.  
392 Association for Computational Linguistics. doi: 10.18653/v1/2021.emnlp-main.612. URL  
393 <https://aclanthology.org/2021.emnlp-main.612>.
- 394 Ashish Vaswani, Noam Shazeer, Niki Parmar, Jakob Uszkoreit, Llion Jones, Aidan N Gomez, Lukasz  
395 Kaiser, and Illia Polosukhin. Attention is all you need. In *Advances in Neural Information*  
396 *Processing Systems 30, NIPS 2017 4-9 December 2017, Long Beach, CA, USA*, pages 5998–6008,  
397 2017. URL <http://papers.nips.cc/paper/7181-attention-is-all-you-need>.
- 398 Feng Wang and Huaping Liu. Understanding the behaviour of contrastive loss. In *Proceedings of the*  
399 *IEEE/CVF Conference on Computer Vision and Pattern Recognition (CVPR)*, pages 2495–2504,  
400 June 2021.
- 401 Xiangpeng Wei, Rongxiang Weng, Yue Hu, Luxi Xing, Heng Yu, and Weihua Luo. On learning uni-  
402 versal representations across languages. In *International Conference on Learning Representations*,  
403 2021. URL <https://openreview.net/forum?id=Uu1Nw-eeTxJ>.
- 404 Guillaume Wenzek, Marie-Anne Lachaux, Alexis Conneau, Vishrav Chaudhary, Francisco Guzmán,  
405 Armand Joulin, and Edouard Grave. CCNet: Extracting high quality monolingual datasets from  
406 web crawl data. In *Proceedings of the Twelfth Language Resources and Evaluation Conference*,  
407 pages 4003–4012, Marseille, France, May 2020. European Language Resources Association. ISBN  
408 979-10-95546-34-4. URL <https://aclanthology.org/2020.lrec-1.494>.
- 409 Adina Williams, Nikita Nangia, and Samuel Bowman. A broad-coverage challenge corpus  
410 for sentence understanding through inference. In *Proceedings of the 2018 Conference of*  
411 *the North American Chapter of the Association for Computational Linguistics: Human Lan-*  
412 *guage Technologies, Volume 1 (Long Papers)*, pages 1112–1122, New Orleans, Louisiana,  
413 June 2018. Association for Computational Linguistics. doi: 10.18653/v1/N18-1101. URL  
414 <https://aclanthology.org/N18-1101>.
- 415 Yinfei Yang, Gustavo Hernandez Abrego, Steve Yuan, Mandy Guo, Qinlan Shen, Daniel Cer, Yun-  
416 hsuan Sung, Brian Strope, and Ray Kurzweil. Improving multilingual sentence embedding using  
417 bi-directional dual encoder with additive margin softmax. In *Proceedings of the Twenty-Eighth*  
418 *International Joint Conference on Artificial Intelligence, IJCAI-19*, pages 5370–5378. International  
419 Joint Conferences on Artificial Intelligence Organization, 7 2019a. doi: 10.24963/ijcai.2019/746.  
420 URL <https://doi.org/10.24963/ijcai.2019/746>.
- 421 Yinfei Yang, Yuan Zhang, Chris Tar, and Jason Baldridge. PAWS-X: A cross-lingual adversar-  
422 ial dataset for paraphrase identification. In *Proceedings of the 2019 Conference on Empirical*  
423 *Methods in Natural Language Processing and the 9th International Joint Conference on Natu-*  
424 *ral Language Processing (EMNLP-IJCNLP)*, pages 3687–3692, Hong Kong, China, Novem-  
425 ber 2019b. Association for Computational Linguistics. doi: 10.18653/v1/D19-1382. URL  
426 <https://aclanthology.org/D19-1382>.

- 427 Yuan Zhang, Jason Baldridge, and Luheng He. PAWS: Paraphrase adversaries from word scrambling.  
 428 In *Proceedings of the 2019 Conference of the North American Chapter of the Association for*  
 429 *Computational Linguistics: Human Language Technologies, Volume 1 (Long and Short Papers)*,  
 430 pages 1298–1308, Minneapolis, Minnesota, June 2019. Association for Computational Linguistics.  
 431 doi: 10.18653/v1/N19-1131. URL <https://aclanthology.org/N19-1131>.
- 432 Michał Ziemski, Marcin Junczys-Dowmunt, and Bruno Pouliquen. The United Nations parallel  
 433 corpus v1.0. In *Proceedings of the Tenth International Conference on Language Resources and*  
 434 *Evaluation (LREC’16)*, pages 3530–3534, Portorož, Slovenia, May 2016. European Language  
 435 Resources Association (ELRA). URL <https://aclanthology.org/L16-1561>.
- 436 Pierre Zweigenbaum, Serge Sharoff, and Reinhard Rapp. Overview of the second BUCC shared  
 437 task: Spotting parallel sentences in comparable corpora. In *Proceedings of the 10th Workshop*  
 438 *on Building and Using Comparable Corpora*, pages 60–67, Vancouver, Canada, August 2017.  
 439 Association for Computational Linguistics. doi: 10.18653/v1/W17-2512. URL [https://www.](https://www.aclweb.org/anthology/W17-2512)  
 440 [aclweb.org/anthology/W17-2512](https://www.aclweb.org/anthology/W17-2512).

|                                                                                                                                                                                                                                                                                                                                                                                                                                                                                                                                                                                                                                                                                                                                                                                                                                                                                                                                             |
|---------------------------------------------------------------------------------------------------------------------------------------------------------------------------------------------------------------------------------------------------------------------------------------------------------------------------------------------------------------------------------------------------------------------------------------------------------------------------------------------------------------------------------------------------------------------------------------------------------------------------------------------------------------------------------------------------------------------------------------------------------------------------------------------------------------------------------------------------------------------------------------------------------------------------------------------|
| <b>Basic Prompt for XNLI/ANLI</b>                                                                                                                                                                                                                                                                                                                                                                                                                                                                                                                                                                                                                                                                                                                                                                                                                                                                                                           |
| <p><b>Task Description:</b> Read the following and determine the relationship between Hypothesis and Premise. Choose relation from “contradiction”, “neutral”, or “entailment”.</p> <p><b>Hypothesis:</b> Yo... no puedo pensar por qué deberías hablarme así, dijo ella, con menos de lo que le había asegurado antes.</p> <p><b>Premise:</b> Ella era una buena amiga de él, por esto le dolía que le hablara así.</p>                                                                                                                                                                                                                                                                                                                                                                                                                                                                                                                    |
| <b>Basic Prompt for MultiSTS</b>                                                                                                                                                                                                                                                                                                                                                                                                                                                                                                                                                                                                                                                                                                                                                                                                                                                                                                            |
| <p><b>Task Description:</b> Read the following sentences and measure the real-valued meaning similarity between these two sentences. You can choose the meaning similarity score, ranging from 0 for no meaning overlap to 5 for meaning equivalence.</p> <p><b>Sentence1:</b> A person is on a baseball team.</p> <p><b>Sentence2:</b> Eine Person spielt in einem Team Basketball.</p>                                                                                                                                                                                                                                                                                                                                                                                                                                                                                                                                                    |
| <b>Basic Prompt for QE</b>                                                                                                                                                                                                                                                                                                                                                                                                                                                                                                                                                                                                                                                                                                                                                                                                                                                                                                                  |
| <p><b>Task Description:</b> Read the Source sentence and its Translation, and estimate the quality of the Translation. You can rate the translation from 0-1 according to the perceived translation quality.</p> <p><b>Source:</b> În Franța a început stagnarea demografică de lungă durată, refacerea durând o generație.</p> <p><b>Translation:</b> In France, long-term demographic stagnation has started, restoring a generation.</p>                                                                                                                                                                                                                                                                                                                                                                                                                                                                                                 |
| <b>Basic Prompt for XCOPA</b>                                                                                                                                                                                                                                                                                                                                                                                                                                                                                                                                                                                                                                                                                                                                                                                                                                                                                                               |
| <p><b>Task Description:</b> Read the Premise and determine which choice is the effect(or cause) of the Premise . Choose from “Choice1” or “Choice2”.</p> <p><b>Premise:</b> Kuki kurukuna wasiman haykurqanku.</p> <p><b>Choice1:</b> Kuki kurukunaqa wasimanta chinkarqanku.</p> <p><b>Choice2:</b> Kuki kuruqa wasip kurkunta mikhurqanku.</p>                                                                                                                                                                                                                                                                                                                                                                                                                                                                                                                                                                                            |
| <b>Basic Prompt for MultiEURLEX</b>                                                                                                                                                                                                                                                                                                                                                                                                                                                                                                                                                                                                                                                                                                                                                                                                                                                                                                         |
| <p><b>Task Description:</b> Read the following sentences and determine the legal topic of the given sentence. Legal topic should choose from ‘international organisations’, ‘social questions’, ‘production’, ‘technology and research’, ‘environment’, ‘energy’, ‘transport’, ‘law’, ‘finance’, ‘education and communications’, ‘trade’, ‘agriculture’, ‘forestry and fisheries’, ‘economics’, ‘agri-foodstuffs’, ‘EUROPEAN UNION’, ‘science’, ‘politics’, ‘international relations’, ‘industry’, ‘geography’, ‘business and competition’, ‘employment and working conditions’.</p> <p><b>Sentence:</b> NEUVOSTON ASETUS (EU) N:o 1390/2013, annettu 16 päivänä joulukuuta 2013, Euroopan unionin ja Komorien liiton kesken näiden välisessä kalastuskumppanuussopimuksessa määrättyjen kalastusmahdollisuuksien ja taloudellisen korvauksen vahvistamisesta hyväksytyn pöytäkirjan mukaisten kalastusmahdollisuuksien jakamisesta ...</p> |
| <b>Basic Prompt for MultiARC</b>                                                                                                                                                                                                                                                                                                                                                                                                                                                                                                                                                                                                                                                                                                                                                                                                                                                                                                            |
| <p><b>Task Description:</b> Read the following review and predict a 5-star scale rating (1 means the poorest experience and 5 represents excellent or outstanding performance) that can best match the review.</p> <p><b>Review:</b> no me llego el articulo me lo mando por correos normal sin seguimiento y nunca me llego tota un desastre</p>                                                                                                                                                                                                                                                                                                                                                                                                                                                                                                                                                                                           |
| <b>Basic Prompt for PAWS-X</b>                                                                                                                                                                                                                                                                                                                                                                                                                                                                                                                                                                                                                                                                                                                                                                                                                                                                                                              |
| <p><b>Task Description:</b> Read the following sentences and determine whether two sentences are paraphrases. Return yes or no.</p> <p><b>Sentence1:</b> La excepción fue entre fines de 2005 y 2009 cuando jugó en Suecia con Carlstad United BK, Serbia con FK Borac Čačak y el FC Terek Grozny de Rusia.</p> <p><b>Sentence2:</b> La excepción se dio entre fines del 2005 y 2009, cuando jugó con Suecia en el Carlstad United BK, Serbia con el FK Borac Čačak y el FC Terek Grozny de Rusia.</p>                                                                                                                                                                                                                                                                                                                                                                                                                                      |

Table 7: Prompts of ChatGPT on each task.

| Model   | en-de        | en-zh        | et-en        | ne-en        | ro-en        | ru-en        | si-en        | en-cs        | en-ja        | km-en        | ps-en        | Avg.         |
|---------|--------------|--------------|--------------|--------------|--------------|--------------|--------------|--------------|--------------|--------------|--------------|--------------|
| XLM-R   | 0.412        | 0.566        | 0.797        | 0.812        | 0.891        | 0.774        | 0.578        | 0.547        | 0.335        | 0.612        | 0.635        | <b>0.632</b> |
| INFOXLM | 0.517        | 0.534        | 0.775        | 0.834        | 0.890        | 0.788        | 0.581        | 0.564        | 0.325        | 0.635        | 0.616        | <b>0.641</b> |
| HICTL   | 0.495        | 0.579        | 0.792        | 0.835        | <b>0.904</b> | 0.787        | 0.575        | 0.556        | 0.342        | 0.625        | 0.648        | <b>0.649</b> |
| EMMA-X  | <b>0.580</b> | <b>0.589</b> | <b>0.809</b> | <b>0.854</b> | 0.897        | <b>0.829</b> | <b>0.593</b> | <b>0.577</b> | <b>0.370</b> | <b>0.641</b> | <b>0.651</b> | <b>0.672</b> |

Table 8: WMT21-QE-Task1 results (Pearson) across different input languages.

| Model   | ar          | de          | el          | en          | es          | hi          | ru          | th          | tr          | vi          | zh          | Avg.        |
|---------|-------------|-------------|-------------|-------------|-------------|-------------|-------------|-------------|-------------|-------------|-------------|-------------|
| XLM-R   | 34.1        | 42.4        | 39.3        | 44.8        | 44.0        | 37.3        | 41.7        | 38.6        | 40.9        | 40.4        | 39.5        | <b>40.3</b> |
| INFOXLM | 39.7        | 52.6        | 39.2        | 55.1        | 53.4        | 36.8        | 51.0        | 28.5        | 41.1        | 48.9        | 47.3        | <b>44.9</b> |
| HICTL   | 40.3        | 53.2        | 41.7        | 56.3        | 54.3        | 39.6        | 51.7        | 30.1        | 42.8        | 48.9        | 48.5        | <b>46.1</b> |
| EMMA-X  | <b>45.1</b> | <b>58.4</b> | <b>45.4</b> | <b>60.6</b> | <b>59.8</b> | <b>41.4</b> | <b>56.3</b> | <b>34.7</b> | <b>47.1</b> | <b>54.6</b> | <b>53.4</b> | <b>50.6</b> |

Table 9: LAReQA results (mean average precision@20, mAP@20) across different input languages.

| Model   | ar          | de          | en          | es          | fa   | ja          | pl          | ro          | ta          | tr          | uk          | Avg.        |
|---------|-------------|-------------|-------------|-------------|------|-------------|-------------|-------------|-------------|-------------|-------------|-------------|
| XLM-R   | 34.6        | 66.0        | 62.6        | 64.8        | 27.1 | 47.8        | 64.8        | 33.7        | 17.8        | 62.3        | 53.2        | <b>48.6</b> |
| INFOXLM | 40.8        | 71.6        | 66.3        | 68.7        | 48.7 | 61.0        | 66.7        | 39.2        | 42.0        | 64.6        | 58.1        | <b>57.1</b> |
| HICTL   | 41.7        | 68.5        | 64.2        | 65.6        | 45.6 | 51.9        | 67.6        | 40.4        | 32.8        | 65.5        | 58.9        | <b>54.8</b> |
| EMMA-X  | <b>50.2</b> | <b>78.7</b> | <b>69.1</b> | <b>63.7</b> | 47.9 | <b>59.6</b> | <b>70.0</b> | <b>50.2</b> | <b>43.5</b> | <b>68.0</b> | <b>60.9</b> | <b>59.6</b> |

Table 10: Mewsli-X results (mean average precision@20, mAP@20) across different input languages.

| Model   | et          | ht          | id          | it          | qu          | sw          | ta          | th          | tr          | vi          | zh          | Avg.        |
|---------|-------------|-------------|-------------|-------------|-------------|-------------|-------------|-------------|-------------|-------------|-------------|-------------|
| XLM-R   | 73.8        | 67.4        | 77.8        | 72.2        | 52.3        | 70.9        | 72.1        | <b>74.6</b> | 73.4        | 73.2        | 75.7        | <b>71.2</b> |
| INFOXLM | 75.1        | 73.4        | <b>78.3</b> | 80.7        | 65.6        | 69.1        | 72.7        | 73.9        | 76.9        | 77.8        | 77.5        | <b>74.6</b> |
| HICTL   | 75.9        | 73.1        | 77.8        | <b>81.2</b> | 65.5        | 73.8        | 72.6        | 73.2        | 76.1        | 75.4        | 78.0        | <b>74.8</b> |
| ChatGPT | 80.6        | 64.1        | 85.6        | 89.2        | 47.4        | 75.9        | 56.4        | 67.3        | 82.2        | 81.5        | 85.8        | <b>74.2</b> |
| EMMA-X  | <b>76.8</b> | <b>74.0</b> | 77.6        | 79.8        | <b>76.2</b> | <b>74.4</b> | <b>77.8</b> | 74.2        | <b>77.6</b> | <b>82.6</b> | <b>89.6</b> | <b>78.2</b> |

Table 11: XCOPA results (accuracy) across different input languages.

| Model   | de          | fr          | ru          | zh          | Avg.        |
|---------|-------------|-------------|-------------|-------------|-------------|
| XLM-R   | 76.1        | 72.3        | 62.3        | 60.8        | <b>67.9</b> |
| INFOXLM | 81.3        | 78.2        | 76.0        | 74.2        | <b>77.4</b> |
| HICTL   | 80.5        | 79.2        | 76.0        | 74.8        | <b>77.6</b> |
| EMMA-X  | <b>85.1</b> | <b>82.8</b> | <b>81.3</b> | <b>78.3</b> | <b>81.9</b> |

Table 12: BUCC results (F1) across different languages.

| Model   | en          | de          | es          | fr          | ja          | ko          | zh          | Avg.        |
|---------|-------------|-------------|-------------|-------------|-------------|-------------|-------------|-------------|
| XLM-R   | 95.7        | 92.2        | 92.7        | 92.5        | 84.7        | 85.9        | 87.1        | <b>90.1</b> |
| INFOXLM | <b>97.7</b> | 94.6        | <b>95.2</b> | 95.1        | 88.9        | 89.0        | 90.2        | <b>93.0</b> |
| HICTL   | 97.4        | 94.2        | 95.0        | 94.2        | 89.1        | 89.5        | 90.2        | <b>92.8</b> |
| ChatGPT | 71.9        | 67.8        | 67.9        | 67.0        | 58.3        | 54.7        | 61.4        | <b>64.2</b> |
| EMMA-X  | 97.3        | <b>95.6</b> | 94.7        | <b>96.0</b> | <b>92.9</b> | <b>89.8</b> | <b>93.0</b> | <b>94.2</b> |

Table 13: PAWS-X results (accuracy) for each language.
